# Supplementary material for: Rapid Eocene diversification of spiny plants in subtropical woodlands of central Tibet
Source: PubMed Central journal article supplement (PMC9249787; doi:10.1038/s41467-022-31512-z), 2022-07-01
Supplement: 41467_2022_31512_MOESM3_ESM.pdf [file 41467_2022_31512_MOESM3_ESM.pdf]

### **Description of Additional Supplementary Files**

File Name: Supplementary Data 1

Description: Paleogene records of herbivorous mammals at genus level on the Tibetan Plateau and regions nearby.

File Name: Supplementary Code 1

Description: Code for phylogeny reconstruction of spiny plants in eudicots in Eurasia during the Cenozoic. Supplementary References
